# Assessment of the aging of the brown adipose tissue by $^{18}\text{F}$ -FDG PET/CT imaging in the progeria mouse model $\text{Lmna}^{\text{G609G/G609G}}$

Zhengjie Wang<sup>1, #</sup>, Xiaolong Xu<sup>2, #</sup>, Yi Liu<sup>1#</sup>, Yongheng Gao<sup>1</sup>, Ennui Ma<sup>1</sup>, Welding Yang<sup>1</sup>, Fei Kang<sup>1, \*</sup>, Baohua Liu<sup>3,4,5 \*</sup>, Jing Wang<sup>1, \*</sup>

<sup>1</sup>Department of Nuclear Medicine, Xijing Hospital, Fourth Military Medical University, No.127 West Changle Road, Xi'an, P.R. China, 710032.

<sup>2</sup>Department of Orthopaedics, Xijing Hospital, Fourth Military Medical University, No.127 West Changle Road, Xi'an, P.R. China, 710032.

<sup>3</sup>Medical Research Center (MRC), Shenzhen Shenzhen University Health Science Center, Shenzhen, China, 518060.

<sup>4</sup>Department of Biochemistry & Molecular Biology, Shenzhen University Health Science Center, Shenzhen, China, 518060.

<sup>5</sup>Guangdong Key Laboratory for Genome Stability and Human Disease Prevention, Shenzhen University Health Science Center, Shenzhen, China, 518060.

<sup>#</sup>These authors contributed equally to this work.

<sup>\*</sup> These authors also contributed equally to this work.

**Key words:**  $\text{Lmna}^{\text{G609G/G609G}}$  mice, BAT, aging,  $^{18}\text{F}$ -FDG PET/CT

**Summary Statement:** BAT aging is closely related to human health and disease,  $\text{Lmna}^{\text{G609G/G609G}}$  mice can mimic normal BAT aging, and  $^{18}\text{F}$ -FDG PET/CT can be used to monitor BAT aging.

## Contact Information

Prof. Fei Kang, Department of Nuclear Medicine, Xijing Hospital, Fourth Military Medical University, No.127 West Changle Road, Xi'an, P.R. China, 710032.

E-mail: [fmmukf@qq.com](mailto:fmmukf@qq.com)

Prof. Baohua Liu, Guangdong Key Laboratory for Genome Stability and Human Disease Prevention, Shenzhen University Health Science Center, Shenzhen, China, 518060. E-mail: [ppliew@szu.edu.cn](mailto:ppliew@szu.edu.cn)

Prof. Jing Wang, Department of Nuclear Medicine, Xijing Hospital, Fourth Military Medical University, No.127 West Changle Road, Xi'an, P.R. China, 710032.

E-mail: [wangjing@fmmu.edu.cn](mailto:wangjing@fmmu.edu.cn)

## ABSTRACT

Brown adipose tissue (BAT) is an important energy metabolic organ that is closely related to obesity, type 2 diabetes, and atherosclerosis. Aging is one of the most important determinants of BAT activity. In this study, we used  $^{18}\text{F}$ -FDG PET/CT imaging to assess the aging of the BAT in  $\text{Lmna}^{\text{G609G/G609G}}$  mice. To evaluate the BAT activity,  $\text{Lmna}^{\text{G609G/G609G}}$  and wild-type (WT) mice were injected with  $^{18}\text{F}$ -FDG, and PET/CT imaging was performed. The maximum standardized uptake value ( $\text{SUV}_{\text{Max}}$ ) of the BAT was measured and the target/nontarget (T/NT) values of BAT were calculated. The transcription and the protein expression levels of the uncoupling protein 1 (UCP1), beta3-adrenergic receptor ( $\beta 3\text{-AR}$ ), and the PRdomain-containing16 (PRDM16), were measured by quantitative real-time polymerase chain reaction (RT-PCR) and Western blotting or immunohistochemical analysis. Apoptosis and cell senescence of the BAT, in WT and  $\text{Lmna}^{\text{G609G/G609G}}$  mice, was detected by Terminal deoxynucleotidyl transferase dUTP nick end labeling (TUNEL), and by CDKN2A/p16INK4a immunohistochemical staining, respectively. At 14 weeks of age, the BAT  $\text{SUV}_{\text{Max}}$  and the expression levels of UCP1,  $\beta 3\text{-AR}$  and PRDM16 in  $\text{Lmna}^{\text{G609G/G609G}}$  mice was significantly lower than that in WT mice. At the same time, the number of p16INK4a and TUNEL positively stained cells (%) increased in  $\text{Lmna}^{\text{G609G/G609G}}$  mice.  $\text{Lmna}^{\text{G609G/G609G}}$  mice are an ideal model for studying BAT aging. The aging characteristics and the aging mechanism of BAT in  $\text{Lmna}^{\text{G609G/G609G}}$  mice can mimic normal BAT aging.

## Introduction

Aging has been defined as the age-related deterioration of physiological functions of an organism. The essence of aging is the process of gradual decline of the functions of the organ system. Brown adipose tissue (BAT) is an adipose organ which is maintaining core temperature in small mammals and in newborn humans (Cannon and Nedergaard 2004). The functional status of BAT is closely related to obesity, type 2 diabetes and atherosclerosis (Berbee et al. 2015; Koksharova et al. 2017). BAT quality and activity are gradually decrease with age (Pfannenberger et al. 2010).

Aging is one of the most important determinants of BAT activity (Lecoultrre and Ravussin 2011). Therefore, it is important to study the relationship between BAT functional status and aging. Since 1996, the researchers conducted long-term study of the relationship between BAT function and aging by measuring BAT-related indicators, including cold-induced heat generation, cold tolerance, body temperature and other macro physiological parameters and in the level of microscopic molecular biomarker such as Uncoupling protein 1 (UCP1), PPAR- $\gamma$  coactivator 1 $\alpha$  (PGC1 $\alpha$ ), PRdomain-containing16 (PRDM16) and beta3-adrenergic receptor (beta3-AR) (Kirov et al. 1996; Lin et al. 2016; Yamashita et al. 1999). However, there are still some problems that cannot be ignored in the above research. Firstly, the research model, as the above study is the normal mouse aging process, and the mouse life of up to 32 weeks, so the research cycle is long, the degree of aging is difficult to unified control(Graber et al. 2015); secondly, the research method, the macroscopic physiological indicators or microscopic molecular markers used in the above studies are indirect data on the metabolic activity of BAT, and often do not accurately reflect the functional status of BAT. Thus, a visualization of the method is necessary to detect BAT metabolic activity of the models of aging.

Since 2003, the presence of adult BAT was confirmed during  $^{18}\text{F}$ -FDG PET scanning (Cohade et al. 2003).  $^{18}\text{F}$ -FDG PET/CT is considered to be the "gold standard" of the current BAT function measurement, and the functional status of BAT can be measured directly in vivo by showing glucose metabolism activity (Cypess et

al. 2014), and has been widely used in the basics and clinical studies of BAT (Cohade et al. 2003; Yeung et al. 2003). Hutchinson-Gilford progeria syndrome (HGPS) is caused by a mutation in the *Lmna* gene (De Sandre-Giovannoli et al. 2003a). According to this phenomenon, the HGPS mouse model (*Lmna*<sup>G609G/G609G</sup> mice) was constructed and as the models of aging have been widely used in aging studies (Chen et al. 2012; Zhang et al. 2014). However, like any premature aging syndrome, *Lmna*<sup>G609G/G609G</sup> is only a partial representation of the multifactorial process of normal aging. The aging of some key organs will not be appearing in *Lmna*<sup>G609G/G609G</sup> models such as nervous system (Jung et al. 2012). Whether the BAT function of the *Lmna*<sup>G609G/G609G</sup> mice is premature senility; whether the level of <sup>18</sup>F-FDG uptake is related to the levels of the molecular markers which are associated with the aging of BAT. The above questions directly determine whether the model is suitable for BAT-related aging studies.

In this study, <sup>18</sup>F-FDG PET/CT imaging technique was used to qualitatively and quantitatively analyze the relationship between <sup>18</sup>F-FDG PET/CT imaging and aging of BAT in *Lmna*<sup>G609G/G609G</sup> mice. The relationship between BAT-related molecular markers UCP1 and  $\beta$ 3-AR levels and <sup>18</sup>F-FDG uptake was examined. In addition, the mechanism of BAT dysfunction in mice was studied.

## Result

### *Effects of age on the metabolic activity of BAT in mice*

To study the effect of age on *Lmna*<sup>G609G/G609G</sup> mice and WT mice, PET/CT imaging was performed from 4 weeks on *Lmna*<sup>G609G/G609G</sup> mice and WT mice, once every two weeks and for 16 weeks. As shown in figure 1A, from 4 weeks to 12 weeks, there was no significant difference in SUV<sub>Max</sub> of BAT between *Lmna*<sup>G609G/G609G</sup> mice and WT mice, indicating that FDG uptake in BAT of *Lmna*<sup>G609G/G609G</sup> mice was no different from that of WT mice at first 12 weeks. As shown in figure 1B, at 14 weeks of age, <sup>18</sup>F-FDG uptake of BAT in *Lmna*<sup>G609G/G609G</sup> mice was significantly lower than that in WT mice. Statistically, the SUV<sub>Max</sub> value and the T/NT ratio of BAT did not

differ significantly between  $Lmna^{G609G/G609G}$  mice and WT mice at 4 weeks of age ( $SUV_{Max}$  value:  $9.260 \pm 0.571$  vs.  $9.373 \pm 0.709$ ,  $p=0.9069$ ; T/NT ratio:  $32.27 \pm 2.278$  vs.  $30.41 \pm 2.411$ ,  $p=0.6223$ ) and at 14 weeks of age, the  $Lmna^{G609G/G609G}$  mice were significantly lower than WT mice ( $SUV_{Max}$  value:  $3.673 \pm 0.4613$  vs.  $10.34 \pm 0.8663$ ,  $p=0.0003$  T/NT ratio:  $11.61 \pm 1.975$  vs.  $33.16 \pm 2.687$ ,  $p=0.0030$ ). These findings confirm that the BAT  $^{18}F$ -FDG uptake in  $Lmna^{G609G/G609G}$  mice decreased significantly at 14 weeks of age.

### *Effects of age on BAT in mice*

To clarify the causes of BAT  $^{18}F$ -FDG uptake decreased in  $Lmna^{G609G/G609G}$  mice, the mRNA and expression of UCP1 and beta3-AR were performed. As shown in Figure 2B, UCP1 and beta3-AR translation in  $Lmna^{G609G/G609G}$  mice were significantly lower than that in WT mice at 14 weeks of age (UCP1  $0.0474 \pm 0.0089$  vs.  $1.000 \pm 0.0666$   $P=0.0001$ ; beta3-AR  $0.3143 \pm 0.0329$  vs.  $1.000 \pm 0.0445$   $p=0.0002$ ). As shown in figure 2C, at 4 weeks of age, there was no difference in the expression of UCP1 and beta3-AR between  $Lmna^{G609G/G609G}$  mice and WT mice (UCP1:  $1.403 \pm 0.1213$  vs.  $1.342 \pm 0.1959$ ,  $p=0.8026$ ; beta3-AR:  $1.200 \pm 0.9090$  vs.  $1.170 \pm 0.1703$   $p=0.8223$ ), while at 14 weeks of age, the expression of UCP1 and beta3-AR was decreased (UCP1:  $0.4854 \pm 0.1012$  vs.  $1.367 \pm 0.2706$   $P=0.0380$ ; beta3-AR:  $0.2830 \pm 0.0497$  vs.  $1.445 \pm 0.1189$   $P=0.0008$ ). Immunohistochemistry analysis were consistent with western blot results. These findings confirm that  $Lmna^{G609G/G609G}$  mice BAT activity decreased, and appeared of aging performance, which was consistent with changes in aging in normal mice (McDonald and Horwitz 1999).

To study the causes of BAT dysfunction, the expression of PRDM16 and was performed, CDKN2A/p16INK4a was performed, which is regarded to be a biomarker of cellular senescence (Hall et al. 2016), and quantify apoptotic cells in BAT was performed by Terminal deoxynucleotidyl transferase dUTP nick end labeling (TUNEL). As shown in figure 3, the transcription and expression of PRMA16 were

decreased at the age of 14 weeks in  $Lmna^{G609G/G609G}$  mice ( $1.000 \pm 0.1582 \pm 1.850 \pm 0.0945$   $P=0.0099$ ). There is a greater number of p16INK4a-expressing cells in the BAT of  $Lmna^{G609G/G609G}$  mice ( $64.33 \pm 2.333\% \pm 50.33 \pm 2.603$   $P=0.0161$ ). Likewise, the number of TUNEL positive cells of BAT in  $Lmna^{G609G/G609G}$  mice were more than that in WT mice ( $4.0 \pm 0.45\%$  vs.  $1.36 \pm 0.1202$   $P=0.0049$ ).

#### *Effects of age on body weight in mice*

As shown in figure 4, the body weight of  $Lmna^{G609G/G609G}$  mice began to decline in the 10th week, while the weight of wild mice continued to increase, indicating that  $Lmna^{G609G/G609G}$  mice began to decline in the state of the body.

### **Discussion**

In this study, we studied the changes of BAT function with age and analyzed the relationship between  $^{18}\text{F}$ -FDG PET/CT imaging and aging of BAT in  $Lmna^{G609G/G609G}$  mice and the mechanism of BAT dysfunction was explored. Our study led to these major findings: Firstly, The BAT function of the  $Lmna^{G609G/G609G}$  mice decreased significantly, and the uptake of  $^{18}\text{F}$ -FDG decreased at the age of 14 weeks. Secondly,  $Lmna^{G609G/G609G}$  mice brown adipocytes produce reduced, increased number of senescence and apoptosis. Thirdly, the  $Lmna^{G609G/G609G}$  mice began to decline in the state of the body at 10 weeks of age earlier than  $^{18}\text{F}$ -FDG uptake decrease.

Aging is an irreversible natural process. It is projected that the combined senior and geriatric population will reach 2.1 billion by 2050 (Mba 2010). Aging is the primary risk factor for major human pathologies, including cancer, diabetes, cardiovascular disorders, neurodegenerative diseases (Lopez-Otin et al. 2013), and is one of the most important determinants of BAT activity in all animals, from rodents to humans (Bahler et al. 2016). Therefore, the study of BAT metabolic activity decreased following aging is of great significance. The aging model for the study of BAT is necessary. Whereas, it was not found that the aging model is suitable for BAT studies until now (Hemmerlyckx et al. 2012; Vermeij et al. 2016). In our study, we found that

Lmna<sup>G609G/G609G</sup> mice BAT had age-related dysfunction, available for BAT aging research. Lmna<sup>G609G/G609G</sup> mice for BAT aging study to solve the problem of long study period, inconsistent degree of aging and other issues.

Lmna<sup>G609G/G609G</sup> mice BAT dysfunction can mimic normal mice BAT aging changes. The changes in BAT in normal mice associated with aging were predominantly reduced in  $\beta$ 3-AR and UCP1 expression (Graja and Schulz 2015). We found that the expression of  $\beta$ 3-AR and UCP1 in Lmna<sup>G609G/G609G</sup> mice decreased in a short time and Lmna<sup>G609G/G609G</sup> mice BAT had age-related dysfunction. The decrease of <sup>18</sup>F-FDG uptake in BAT of Lmna<sup>G609G/G609G</sup> mice was closely related to the decrease of  $\beta$ 3-AR and UCP1 expression. Exposure to cold has been known to stimulation the sympathetic nervous system via binding of the neurotransmitter norepinephrine to the  $\beta$ 3-AR (Himms-Hagen et al. 2000).  $\beta$ 3-AR stimulation increases glucose uptake in BAT (Inokuma et al. 2005a) through increasing in transcription and de novo synthesis of glucose transporter molecule 1 (GLUT1) (Olsen et al. 2014). we also found that Lmna<sup>G609G/G609G</sup> mice GLUT1 transcription level was significantly lower than WT mice (supplementary figure 2). In the cold stimulation,  $\beta$ 3-AR not only increases glucose transport, but also increases UCP1 expression and activity (Collins et al. 2010). Although Hankir MK et al. thought that BAT <sup>18</sup>F-FDG uptake and UCP1-mediated heat production can be dissociated (Hankir et al. 2017), most studies suggest that UCP1 is necessary for norepinephrine-induced glucose utilization in BAT (Inokuma et al. 2005b). The reduction in expression of UCP1 in Lmna<sup>G609G/G609G</sup> mice further reduced the uptake of <sup>18</sup>F-FDG in BAT.

The mechanism of BAT dysfunction in Lmna<sup>G609G/G609G</sup> mice also simulates the mechanism of BAT aging in normal mice (Harms et al. 2014). The mechanism of premature aging in the HGPS mouse model is a point mutation in position 1824 of the LMNA gene, in which cytosine is replaced with thymine. This mutation creates an abnormal splice donor site, which produces a truncated protein (progerin) lacking residues 607–656 of prelamin A but retaining the C-terminal CAAX box, a target for prenylation (De Sandre-Giovannoli et al. 2003b). Progerin cannot be detached from

the nuclear membrane, and ultimately damage the structure and function of the nucleus (Cao et al. 2011). Progerin also participated the normal process of aging (Ragnauth et al. 2010; Rodriguez et al. 2009). Therefore, HGPS accelerate a subset of the pathological changes that together drive the normal ageing process (Burtner and Kennedy 2010; Lopez-Otin et al. 2013).  $Lmna^{G609G/G609G}$  mice mimic the physiological aging of BAT from both sides. Firstly, Brown fat cells formation was reduced. The expression of PRDM16 expression was decreased in  $Lmna^{G609G/G609G}$  mice, which acts as a transcription coregulator that controls the development of brown adipocytes in BAT (Seale et al. 2011). Secondly, the number of BAT cells changed (Sellayah and Sikder 2014). We also found that the increase in BAT cell apoptosis and senescent cells in  $Lmna^{G609G/G609G}$  mice resulted in a decrease in the number of cells.

Aging is a systemic change,  $Lmna^{G609G/G609G}$  mice weight began to decrease in the 10th week. HGPS model were lean (Sullivan et al. 1999), and myopathic disease (Cutler et al. 2002), which lead to body weight decreased before BAT  $^{18}F$ -FDG uptake decrease, indicating that  $Lmna^{G609G/G609G}$  mice began to decline in the state of the body before BAT aging.

We studied the aging of BAT in  $Lmna^{G609G/G609G}$  mice from the perspective of glucose metabolism.  $^{18}F$ -FDG is current ‘gold-standard’ for the identification and quantification of BAT metabolic activity, but it cannot discriminate between oxidative and non-oxidative BAT glucose metabolism (Blondin et al. 2015a; Orava et al. 2011). In addition to  $^{18}F$ -FDG, there are still other tracers used in aging of BAT metabolic activity studies (Blondin et al. 2015b; U et al. 2016), to more comprehensive assessment of BAT metabolic activity, the application of other tracers is also necessary.

## Materials and Methods

### *Animal Preparation and $^{18}F$ -FDG Micro-PET/CT Imaging*

$Lmna^{G609G/G609G}$  mice(N=6) obtained from Department of Biochemistry & Molecular Biology, Shenzhen University Health Science Center and experiments were

performed in accordance with Animal Experimental Ethics Committee of The Fourth Military Medical University approved protocols. Aging mice were identified by PCR (Supplementary Figure1). Mice were cold treated under fasting conditions for a duration of 4 hours before they received one dose of  $^{18}\text{F}$ -FDG (Wang et al. 2012). Ensure the mice are fasting but with access to water. 200-300uCi of  $^{18}\text{F}$ -FDG in 150ul of saline were intraperitoneal injected into each mouse. The mice were remained in the cold for one additional hour post FDG injection, and then scanned with a small animal-dedicated micro-PET/CT system. Once anesthesia is induced, the animals were moved onto mice bed with its head resting within a cone face mask that continuously delivers Isoflurane (2%) at a flow rate of 1.5 L/min. An electric heating pad is placed under the animal to help maintain the body temperature using a heating pad provided with the small-animal PET/CT system. PET/CT data were acquired for 600s for each mouse with continuous anesthesia. All PET/CT images were processed and analyzed using Nucline nanoScan software (Mediso). For semi-quantitative analysis, three-dimensional (3D) regions of interest were carefully drawn and adjusted manually according to CT images over the borders of the BAT on small-animal PET images of each mice. Three-dimensional round regions of interest were delineated on the lung as a nontarget (NT) reference. Tracer uptake by BAT and lung was quantified as standardized uptake values (SUV) using the formula:  $\text{SUV} = \text{tissue activity concentration (Bq/mL)} / \text{injected dose (Bq)} \times \text{body weight (g)}$ . The uptake ratio (T/NT) of the mean BAT and mean NT uptake was calculated and compared.

#### *Quantitative Real Time Reverse Transcription-PCR*

After the mice were sacrificed, total RNA was isolated from BAT using an Total RNA Kit (Omega Bio-Tek, Georgia, USA) according to the manufacturer's guidelines. Single stranded cDNA was synthesized from total RNA with the PrimeScript<sup>TM</sup> RT Master Mix (TaKaRa, Dalian, China). Real time RT-PCR for each target was performed with SYBR<sup>®</sup>Premix Ex Taq II (TaKaRa). The thermal cycling condition was set as follows: pre-heating (30 seconds at 94°C) and 40 cycles of

denaturation (10 seconds at 94°C), annealing (30 seconds at 60°C) and elongation (20 seconds at 72°C). Each mRNA level was normalized with the internal control  $\beta$ -actin mRNA level. The pairs of primer are listed in Table 1

TABLE 1  
Primers Used in Quantitative RT PCR Experiments

| Primer           | Primer sequence (5'-3') |
|------------------|-------------------------|
| $\beta$ -actin-S | GTGACGTTGACATCCGTAAAGA  |
| $\beta$ -actin-A | GTAACAGTCCGCCTAGAAGCAC  |
| $\beta$ 3-AR-S   | CCTTCCGTCGTCTTCTGTGTAG  |
| $\beta$ 3-AR-A   | CTGTTGAGCGGTGGACTCTG    |
| Ucp1-S           | ACAGTAAATGGCAGGGGACG    |
| Ucp1-A           | CACGGGGACCTACAATGCTT    |
| GLUT1-S          | ACGCCCCCAGAAGGTTAT      |
| GLUT1-A          | GCGTGGTGAGTGTGGTGGAT    |
| PRDM16-S         | ATGGGATCCATGAAGAACGGT   |
| PRDM16-A         | CACGTCTACGGTGAACGGAA    |

#### *Western blot analysis*

After the mice were sacrificed, protein was extracted, the total protein concentration in the samples was determined using the bicinchoninic acid (BCA; Boster, Hubei, China) method and adding 5×loading buffering heated 5 min at 100°C. 40μg of protein from each sample was loaded onto 10% sodium dodecyl sulfate-polyacrylamide 1-mm gels and transferred onto NC membranes. To detect the target proteins, we blocked the membranes for 2h with 5% bovine serum albumin (BSA; Boster, Hubei, China) at 4°C. Then, the membranes were incubated overnight at 4°C with anti-beta3(1:1000, Abcam, USA) antibodies or anti-UCP1(1:1000, Cell Signaling Technology, USA) specifically recognizing the target proteins. The membranes were subsequently washed with Tris-buffered saline containing Tween-20

(TBST) for 5 min five times and incubated for 1 h at room temperature with secondary antibody. The membrane was washed in TBST for 5 min five times. Blots were detected using enhanced chemiluminescence (ECL) method. The images were captured and analyzed by ImageJ software.

### *Immunohistochemistry Analysis*

The BAT was harvested from dead mice and fixed in 10% formalin. Formalin-fixed, paraffinembedded tissue blocks were serially cut into 3-mm-thick sections, which were dewaxed in xylene and rehydrated through a graded series of ethanol solutions. After 3 washes in PBS, heat-induced antigen was retrieved in 0.01 M citric acid buffer (pH 6.0) and autoclaved for 5 min at 120°C. Nonspecific binding sites were blocked through preincubation with normal bovine serum for 30 min. Slices were washed 3 times in PBS for 5 min each wash. These tissue sections were then incubated with anti-beta3-AR antibodies (1:100; Abcam), anti-UCP1 antibodies (1:50; Cell Signaling Technology), PRDM16 (1:100; Abcam), or p16INK4a (1:500; Abcam, diluted in 4% BSA dissolved in PBST 2.5% Triton X-100 in PBS) followed by horseradish peroxidase-conjugated antirabbit IgG (1:1000; EarthOx). In all sections, positive cells were visualized using 3,3-diaminobenzidine tetrahydrochloride (Shanghai Sangon) as a chromogen and were counterstained with hematoxylin. Quantification of the immunostaining was performed by digital image analysis with the Image-Pro Plus 6.0 software (Media Cybernetics). The integrated optical density (IOD) of all the positive staining in each field and areas of interest (AOI) were measured. The IOD was used to evaluate the area and intensity of the positive staining. The mean density (IOD/AOI) represented the concentration of specific protein per unit area.

### *Detection of Cell Apoptosis in Brown Adipose Tissue*

Tissue apoptosis was assessed using sections for Tunel staining (Beyotime, Beijing, China) according to the manufacturer's protocol. Briefly, after dewaxing and

hydration, sections were incubated with TUNEL reaction mixture. Nuclei were stained using DAPI. Afterwards, slides were observed using a fluorescence microscope (400×; TE-2000U, Nikon, Japan). For each staining, totally 3 sections per group are observed.

### *Statistical Analysis*

All values are expressed as mean  $\pm$  SEM. Statistical analysis was performed using GraphPad Prism Software. The differences between two groups were determined by Student's t test. The probability value of  $P < 0.05$  was considered significant.

### **Acknowledgments**

We thank Liu Yang from Department of Orthopaedics, Xijing Hospital, Fourth Military Medical University, (Xi'an, China) for her generous support.

### **Conflict of interest statement**

There is no conflict of interest in this manuscript.

### **Funding**

This work was supported by the National Natural Science Foundation of China (Grant Nos. 81230033, 81227901), the National Key Research and Development Program of China (Grant No. 2016YFC0103804) and supported by Research Grants from Shenzhen (CXZZ20140903103747568, KQTD20140630100746562 and Discipline Construction Funding of Shenzhen)

## References:

- Bahler, L., Verberne, H.J., et al. (2016) Differences in Sympathetic Nervous Stimulation of Brown Adipose Tissue Between the Young and Old, and the Lean and Obese. *J NUCL MED* 57: 372-377.
- Berbee, J.F., Boon, M.R., et al. (2015) Brown fat activation reduces hypercholesterolaemia and protects from atherosclerosis development. *NAT COMMUN* 6: 6356.
- Blondin, D.P., Labbe, S.M., et al. (2015a) Selective Impairment of Glucose but Not Fatty Acid or Oxidative Metabolism in Brown Adipose Tissue of Subjects With Type 2 Diabetes. *DIABETES* 64: 2388-2397.
- Blondin, D.P., Labbe, S.M., et al. (2015b) Selective Impairment of Glucose but Not Fatty Acid or Oxidative Metabolism in Brown Adipose Tissue of Subjects With Type 2 Diabetes. *DIABETES* 64: 2388-2397.
- Burtner, C.R. and Kennedy, B.K. (2010) Progeria syndromes and ageing: what is the connection? *Nat Rev Mol Cell Biol* 11: 567-578.
- Cannon, B. and Nedergaard, J. (2004) Brown adipose tissue: function and physiological significance. *PHYSIOL REV* 84: 277-359.
- Cao, K., Graziotto, J.J., Blair, C.D., et al. (2011) Rapamycin reverses cellular phenotypes and enhances mutant protein clearance in Hutchinson-Gilford progeria syndrome cells. *SCI TRANSL MED* 3: 58r-89r.
- Chen, C.Y., Chi, Y.H., et al. (2012) Accumulation of the inner nuclear envelope protein Sun1 is pathogenic in progeric and dystrophic laminopathies. *CELL* 149: 565-577.
- Cohade, C., Osman, M., et al. (2003) Uptake in supraclavicular area fat ("USA-Fat"): description on 18F-FDG PET/CT. *J NUCL MED* 44: 170-176.
- Collins, S., Yehuda-Shnaidman, E., et al. (2010) Positive and negative control of Ucp1 gene transcription and the role of beta-adrenergic signaling networks. *Int J Obes (Lond)* 34 Suppl 1: S28-S33.
- Cutler, D.A., Sullivan, et al. (2002) Characterization of adiposity and metabolism in Lmna-deficient mice. *Biochem Biophys Res Commun* 291: 522-527.
- Cypess, A.M., Haft, C.R., et al. (2014) Brown fat in humans: consensus points and experimental guidelines. *CELL METAB* 20: 408-415.
- De Sandre-Giovannoli, A., Bernard, R., Cau, P., et al. (2003a) Lamin a truncation in Hutchinson-Gilford progeria. *SCIENCE* 300: 2055.

- De Sandre-Giovannoli, A., Bernard, R., et al. (2003b) Lamin a truncation in Hutchinson-Gilford progeria. *SCIENCE* 300: 2055.
- Graber, T.G., Kim, J.H., et al. (2015) C57BL/6 life span study: age-related declines in muscle power production and contractile velocity. *Age (Dordr)* 37: 9773.
- Graja, A. and Schulz, T.J. (2015) Mechanisms of aging-related impairment of brown adipocyte development and function. *GERONTOLOGY* 61: 211-217.
- Hall, B.M., Balan, V., et al. (2016) Aging of mice is associated with p16(Ink4a)- and beta-galactosidase-positive macrophage accumulation that can be induced in young mice by senescent cells. *Aging (Albany NY)* 8: 1294-1315.
- Hankir, M.K., Kranz, M., et al. (2017) Dissociation between brown adipose tissue 18F-FDG uptake and thermogenesis in uncoupling protein 1 deficient mice. *J NUCL MED*.
- Harms, M.J., Ishibashi, J., et al. (2014) Prdm16 is required for the maintenance of brown adipocyte identity and function in adult mice. *CELL METAB* 19: 593-604.
- Hemmerlyckx, B., Hoylaerts, M.F., et al. (2012) Effect of premature aging on murine adipose tissue. *EXP GERONTOL* 47: 256-262.
- Himms-Hagen, J., Melnyk, A., et al. (2000) Multilocular fat cells in WAT of CL-316243-treated rats derive directly from white adipocytes. *Am J Physiol Cell Physiol* 279: C670-C681.
- Inokuma, K., Ogura-Okamatsu, Y., et al. (2005a) Uncoupling protein 1 is necessary for norepinephrine-induced glucose utilization in brown adipose tissue. *DIABETES* 54: 1385-1391.
- Inokuma, K., Ogura-Okamatsu, Y., et al. (2005b) Uncoupling protein 1 is necessary for norepinephrine-induced glucose utilization in brown adipose tissue. *DIABETES* 54: 1385-1391.
- Jung, H.J., Coffinier, C., et al. (2012) Regulation of prelamin A but not lamin C by miR-9, a brain-specific microRNA. *Proc Natl Acad Sci U S A* 109: E423-E431.
- Kirov, S.A., Talan, M.I., et al. (1996) Nonshivering thermogenesis during acute cold exposure in adult and aged C57BL/6J mice. *EXP GERONTOL* 31: 409-419.
- Koksharova, E., Ustyuzhanin, D., et al. (2017) The Relationship Between Brown Adipose Tissue Content in Supraclavicular Fat Depots and Insulin Sensitivity in Patients with Type 2 Diabetes Mellitus and Prediabetes. *Diabetes Technol Ther* 19: 96-102.
- Lecoultrre, V. and Ravussin, E. (2011) Brown adipose tissue and aging. *Curr Opin Clin Nutr Metab Care* 14: 1-6.
- Lin, L., Lee, J.H., et al. (2016) Ghrelin receptor regulates adipose tissue inflammation in aging. *Aging (Albany NY)* 8: 178-191.
- Lopez-Otin, C., Blasco, M.A., et al. (2013) The hallmarks of aging. *CELL* 153: 1194-1217.
- Mba, C.J. (2010) Population ageing in ghana: research gaps and the way forward. *J Aging Res* 2010: 672157.
- McDonald, R.B. and Horwitz, B.A. (1999) Brown adipose tissue thermogenesis during aging and senescence. *J BIOENERG BIOMEMBR* 31: 507-516.
- Olsen, J.M., Sato, M., et al. (2014) Glucose uptake in brown fat cells is dependent on mTOR complex 2-promoted GLUT1 translocation. *J CELL BIOL* 207: 365-374.
- Orava, J., Nuutila, P., et al. (2011) Different metabolic responses of human brown adipose tissue to activation by cold and insulin. *CELL METAB* 14: 272-279.
- Pfannenberger, C., Werner, M.K., et al. (2010) Impact of age on the relationships of brown adipose tissue with sex and adiposity in humans. *DIABETES* 59: 1789-1793.
- Ragnauth, C.D., Warren, D.T., et al. (2010) Prelamin A acts to accelerate smooth muscle cell

- senescence and is a novel biomarker of human vascular aging. *CIRCULATION* 121: 2200-2210.
- Rodriguez, S., Coppede, F., et al. (2009) Increased expression of the Hutchinson-Gilford progeria syndrome truncated lamin A transcript during cell aging. *EUR J HUM GENET* 17: 928-937.
- Seale, P., Conroe, H.M., et al. (2011) Prdm16 determines the thermogenic program of subcutaneous white adipose tissue in mice. *J CLIN INVEST* 121: 96-105.
- Sellayah, D. and Sikder, D. (2014) Orexin restores aging-related brown adipose tissue dysfunction in male mice. *ENDOCRINOLOGY* 155: 485-501.
- Sullivan, T., Escalante-Alcalde, D., et al. (1999) Loss of A-type lamin expression compromises nuclear envelope integrity leading to muscular dystrophy. *J CELL BIOL* 147: 913-920.
- U, D.M., Raiko, J., Saari, T., et al. (2016) Human brown adipose tissue [(15)O]O<sub>2</sub> PET imaging in the presence and absence of cold stimulus. *Eur J Nucl Med Mol Imaging* 43: 1878-1886.
- Vermeij, W.P., Hoeijmakers, J.H., et al. (2016) Genome Integrity in Aging: Human Syndromes, Mouse Models, and Therapeutic Options. *Annu Rev Pharmacol Toxicol* 56: 427-445.
- Wang, X., Minze, L.J., et al. (2012) Functional imaging of brown fat in mice with 18F-FDG micro-PET/CT. *J Vis Exp*.
- Yamashita, H., Sato, Y., et al. (1999) Difference in induction of uncoupling protein genes in adipose tissues between young and old rats during cold exposure. *FEBS LETT* 458: 157-161.
- Yeung, H.W., Grewal, R.K., et al. (2003) Patterns of (18)F-FDG uptake in adipose tissue and muscle: a potential source of false-positives for PET. *J NUCL MED* 44: 1789-1796.
- Zhang, H., Xiong, Z.M., et al. (2014) Mechanisms controlling the smooth muscle cell death in progeria via down-regulation of poly(ADP-ribose) polymerase 1. *Proc Natl Acad Sci U S A* 111: E2261-E2270.

## Figures

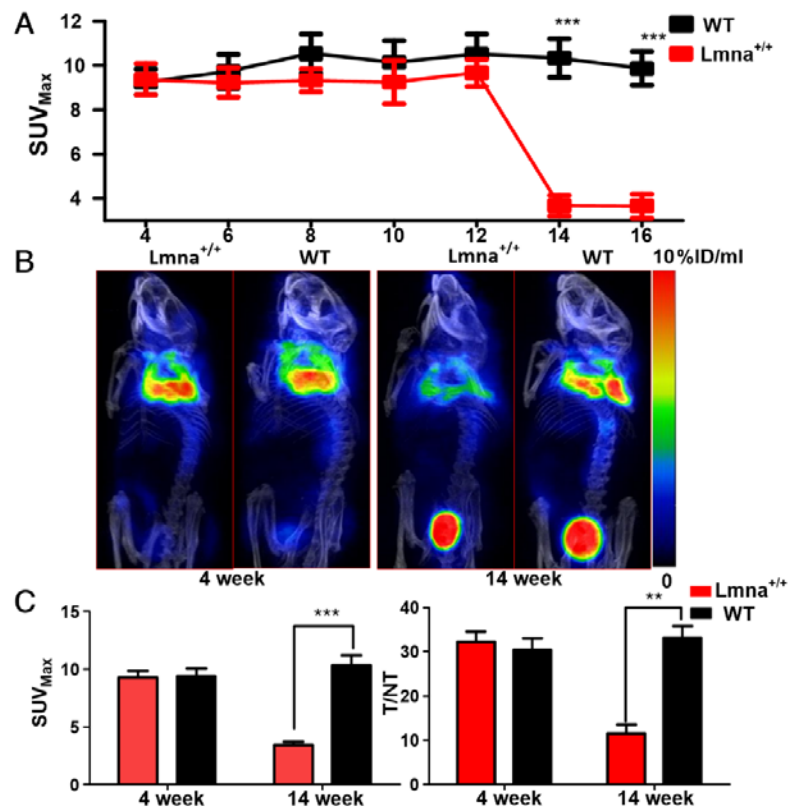

**Figure 1. PET of BAT from  $Lmna^{G609G/G609G}$  ( $Lmna^{+/+}$ ) mice and wild-type(WT) mice. (A) The changes of SUV<sub>Max</sub> in BAT from 4 to 16 weeks in mice. (B)  $Lmna^{G609G/G609G}$  mice and WT mice PET / CT images at 4 weeks and 14 weeks. (C)**

Quantification of SUV<sub>Max</sub> and T/NT (target/nontarget) values of BAT of *Lmna*<sup>G609G/G609G</sup> mice and WT mice at 4 and 14 weeks. Lung tissue was defined as NT reference. \*P<0.05. \*\*P<0.01. \*\*\*P<0.001.

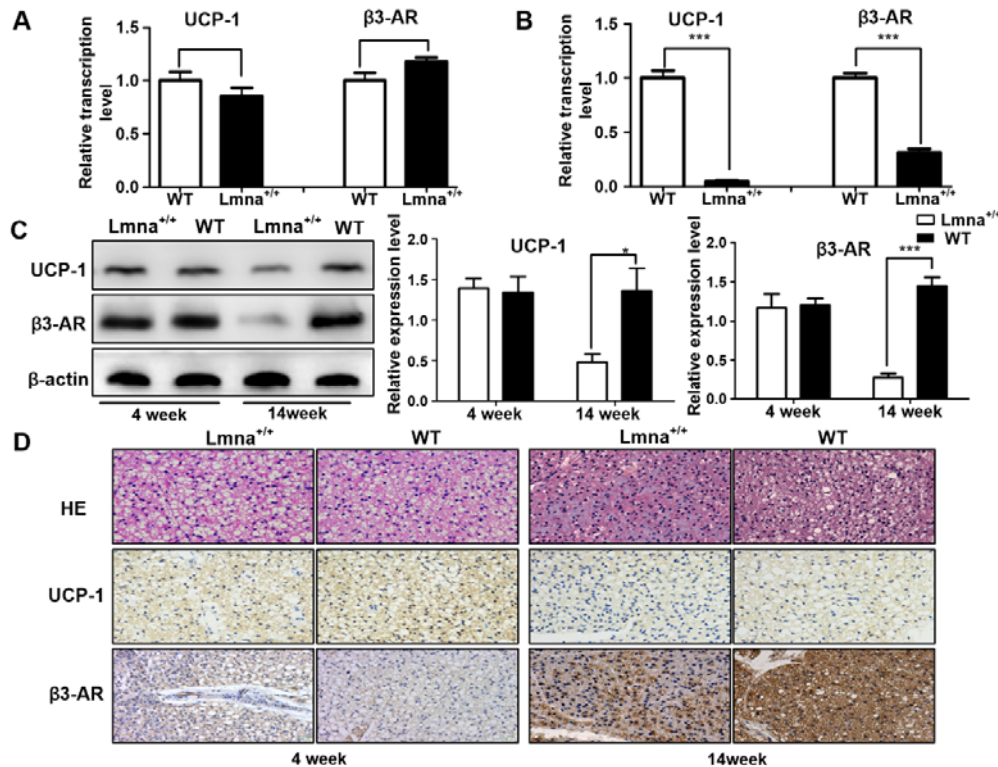

**Figure 2. Analysis of beta3-AR and UCP1 level in BAT of *Lmna*<sup>G609G/G609G</sup> (*Lmna*<sup>+/+</sup>) mice and WT mice.** (A) (B)Relative transcription level of UCP-1 and  $\beta$ 3-AR of aged mice and WT mice at 4week and 14 weeks. (C) Western blot of UCP1, beta3-AR and  $\beta$ -actin and Semi-quantitative analysis of expression levels of UCP1,  $\beta$ 3-AR. (D) BAT hematoxylin and eosin stain and Immunohistochemical analysis of beta3-AR and UCP1. \*P<0.05. \*\*P<0.01\*\*\*P<0.001.

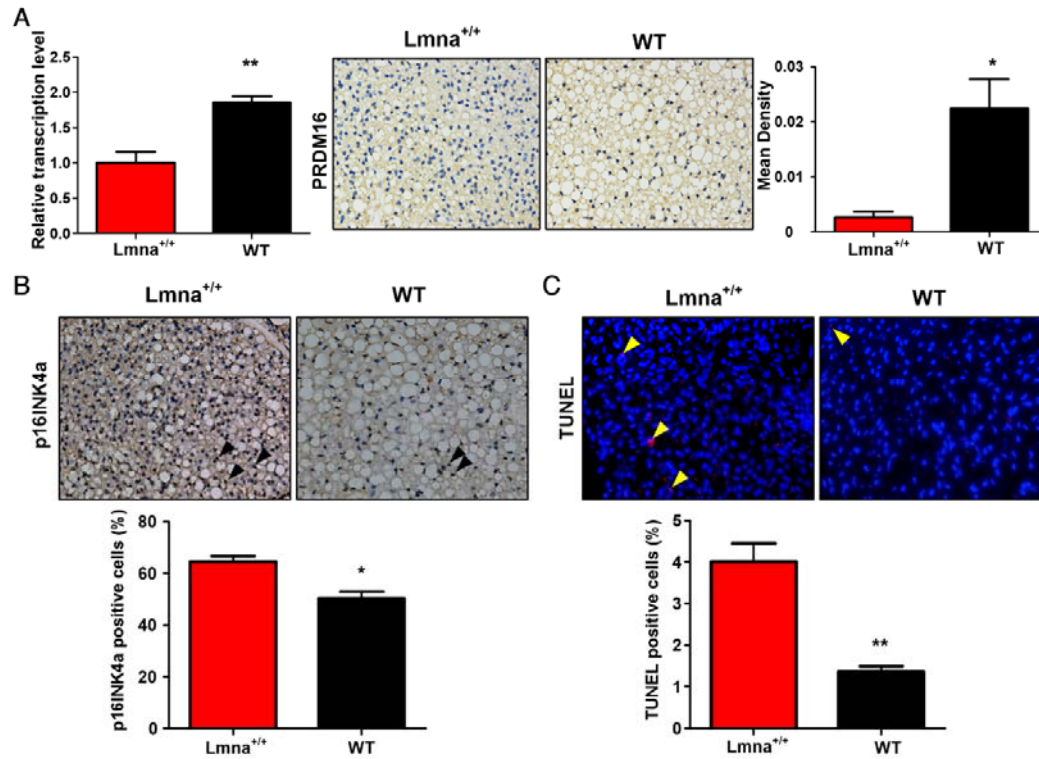

**Figure 3.** Analysis of PRDM16 level and cell senescence and apoptosis in BAT of Lmna<sup>G609G/G609G</sup> (Lmna<sup>+/+</sup>) mice and WT mice. (A) Relative transcription level and Immunohistochemical analysis of PRDM16 of Lmna<sup>G609G/G609G</sup> mice and WT mice at 14 weeks. (B) (C) Images of p16INK4a (black, open arrowheads) immunostaining and TUNEL (yellow, open arrowheads) assay in BAT of Lmna<sup>G609G/G609G</sup> (Lmna<sup>+/+</sup>) mice and WT mice, and quantification of positive for p16INK4a and TUNEL. \*P < 0.05. \*\*P < 0.01.

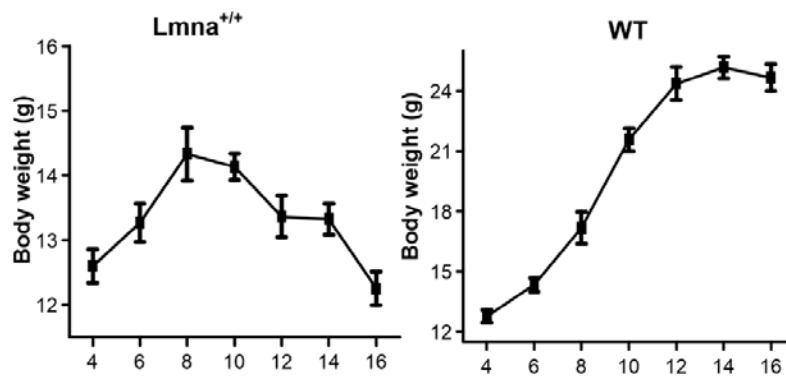

**Figure4.** Changes of body weight with age in *Lmna*<sup>G609G/G609G</sup> and WT mice.

## Supplemental material

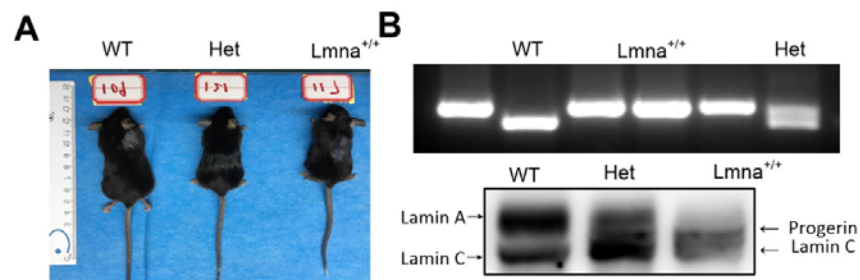

**Supplementary figure 1. Identification of Lmna<sup>+/+</sup> mice and characterization of the model.** (A) Comparison of mice at 14 weeks of age. (B) Lmna<sup>+/+</sup> mice were identified by PCR and western blot.

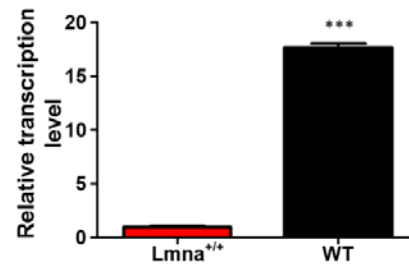

**Supplementary figure 2. Relative transcription levels of GLUT1 in the BAT of Lmna<sup>+/+</sup> and WT mice. \*\*\* P < 0.001.**

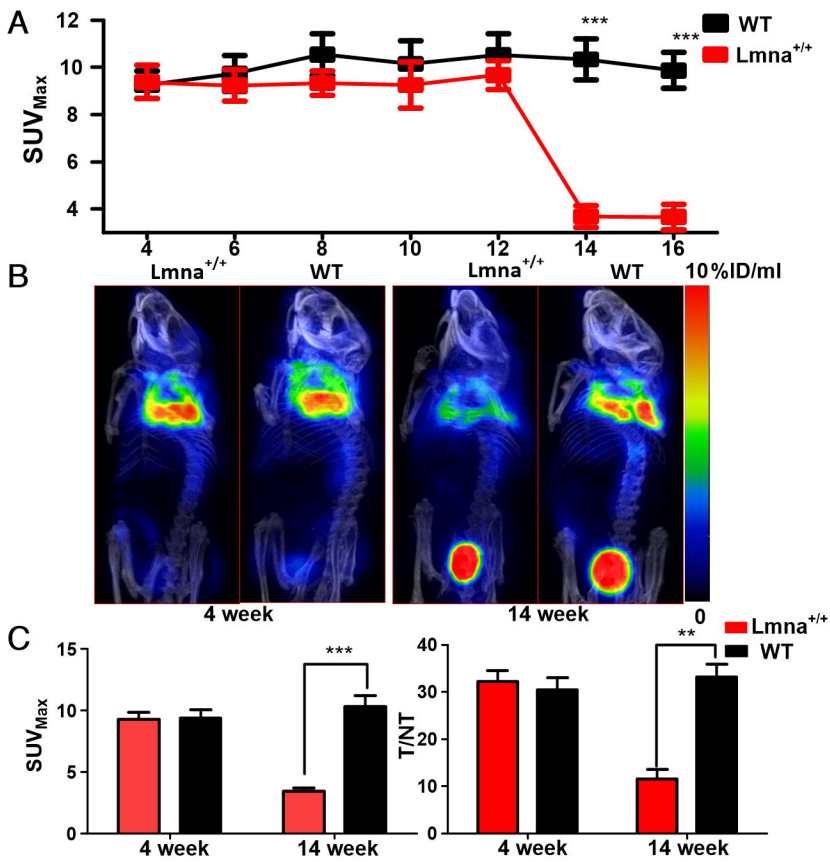

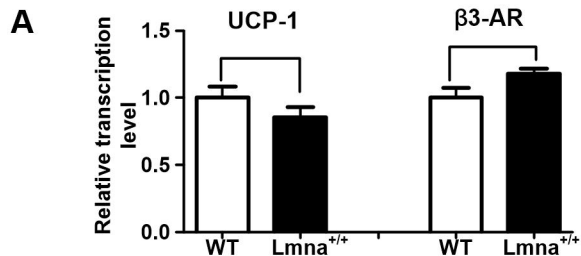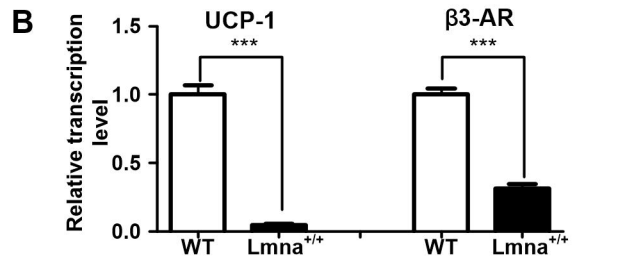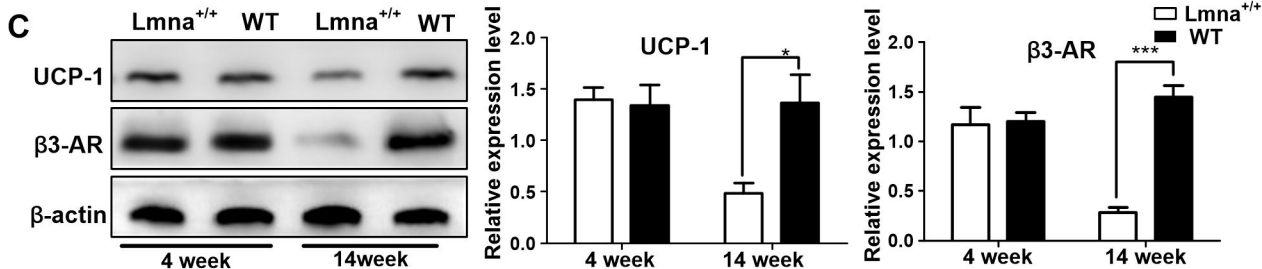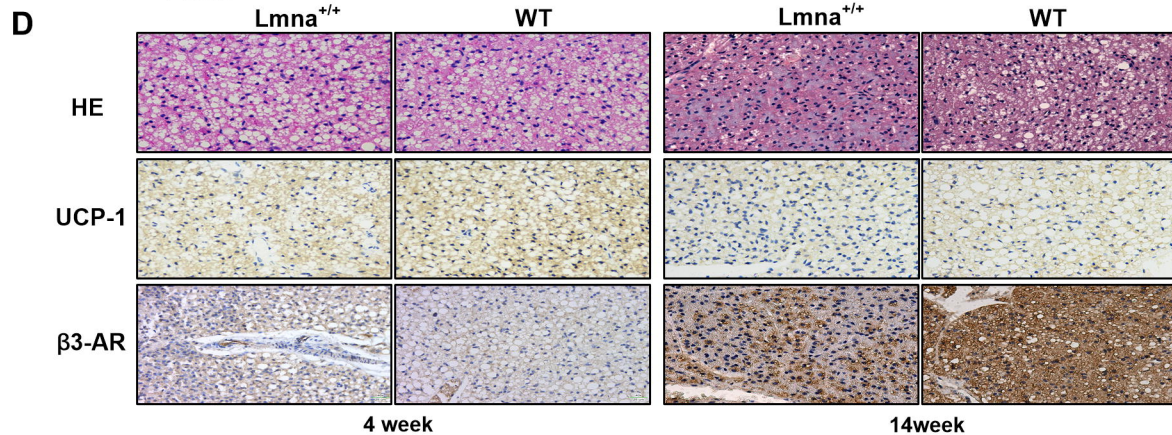

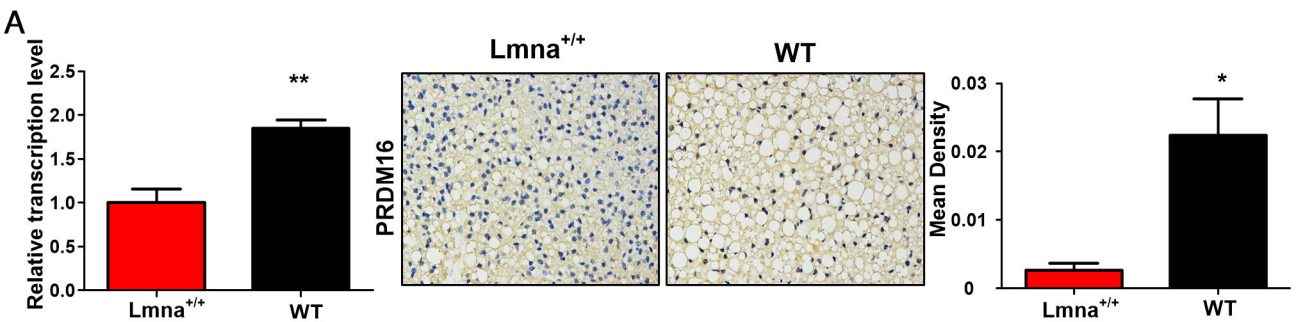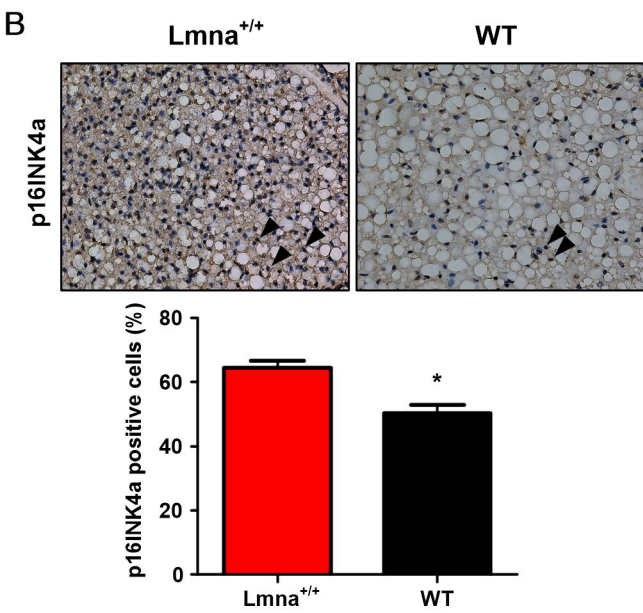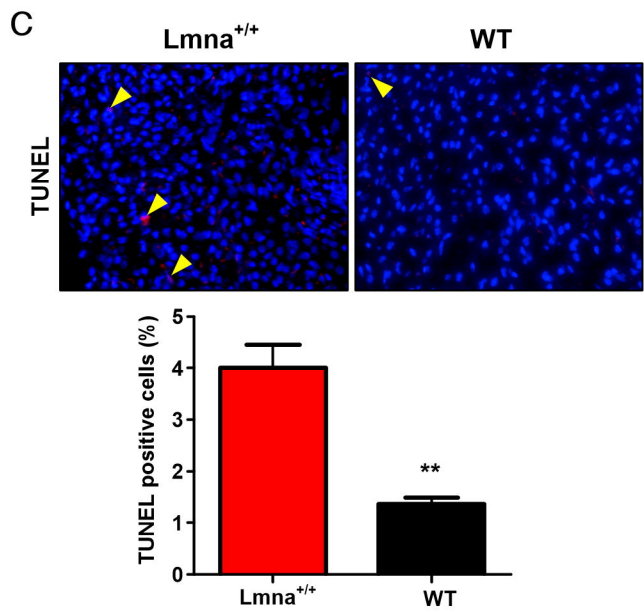

**Lmna<sup>+/+</sup>**

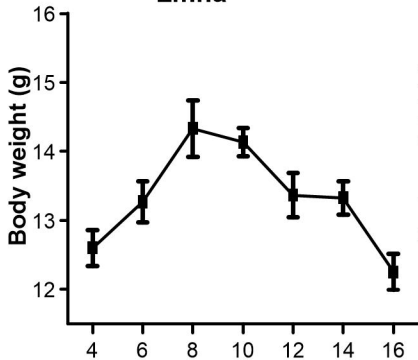

**WT**

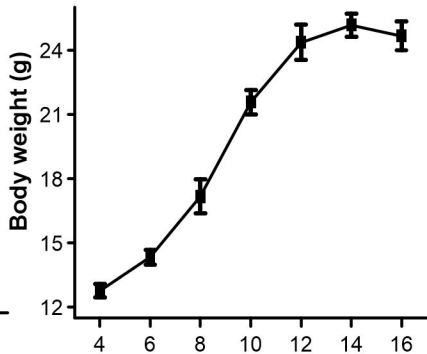

Source: https://www.biorxiv.org/content/10.1101/220061v1.full.pdf
